# Supplementary material
Source: PubMed Central journal article supplement (PMC1482654)
Supplement: pnas_0510258103_2.pdf [file pnas_0510258103_2.pdf]

## Supplementary table. Representations of pathways in best (most overlapping) clusters.

### \* Content of a pathway:

- Records: the number of independent records in the Palsson collection.
- Genes: the number of listed genes (operons encoding multisubunit complexes are listed as single genes).

• Reactions: the number of different reactions.

Example. The following set of records contains:

- 6 records: 165, 166, 174, 628, 660, 661
- 6 genes: *speC*, *speF*, *artPMQJI*, *argT*, *hisMQP*, *potABCD* (occurs twice)
- 5 reactions (ORN => PTRC + CO2 occurs twice)

|     |                             |                                |          |                                                   |
|-----|-----------------------------|--------------------------------|----------|---------------------------------------------------|
| 165 | <i>speC</i>                 | ORN => PTRC + CO2              | 4.1.1.17 | Arginine, Putrescine, and Spermidine Biosynthesis |
| 166 | <i>speF</i>                 | ORN => PTRC + CO2              | 4.1.1.17 | Arginine, Putrescine, and Spermidine Biosynthesis |
| 174 | -                           | KMB+ GLN => GLU + MET          |          | Arginine, Putrescine, and Spermidine Biosynthesis |
| 628 | <i>artPMQJI argT hisMQP</i> | ARGxt+ ATP => ARG + ADP + PI   |          | Membrane Transport: Amino Acids                   |
| 660 | <i>potABCD</i>              | SPMDxt+ ATP => SPMD + ADP + PI |          | Membrane Transport: Amino Acids                   |
| 661 | <i>potABCD</i>              | PTRCxt+ ATP => PTRC + ADP + PI |          | Membrane Transport: Amino Acids                   |

|   | pathway                                         | Content*<br>records/<br>genes/<br>reactions | Clusters       | Pathway &<br>cluster                                                                                                                     | Pathway –<br>cluster<br>(lost)                                                                                                                                                                                                                     | Cluster –<br>pathway<br>(false) | comments |
|---|-------------------------------------------------|---------------------------------------------|----------------|------------------------------------------------------------------------------------------------------------------------------------------|----------------------------------------------------------------------------------------------------------------------------------------------------------------------------------------------------------------------------------------------------|---------------------------------|----------|
| 1 | EMP                                             |                                             | Three clusters | 1: <i>pgi</i> ,<br>17: <i>tpiA</i> ,<br><i>gapA</i> , <i>pgk</i> ,<br>170: <i>glgC</i> ,<br><i>glgA</i> , <i>glgP</i> ,<br><i>malP</i> . | <i>glk</i> , <i>galM</i> ,<br><i>agp</i> , <i>pfkA</i> ,<br><i>pfkB</i> , <i>fbp</i> ,<br><i>fbaA</i> , <i>gapC</i> ,<br><i>gpmA</i> ,<br><i>gpmB</i> , <i>eno</i> ,<br><i>ppsA</i> , <i>pykA</i> ,<br><i>pykF</i> , <i>lpdA</i> ,<br><i>aceEF</i> |                                 |          |
| 2 | Pentose phosphate<br>(and Embden-<br>Doudoroff) |                                             | 18             | <i>tktA</i> , <i>tktB</i> , <i>talB</i>                                                                                                  | <i>zwf</i> , <i>pgl</i> ,<br><i>gnd</i> , <i>rpiA</i> ,<br><i>rpiB</i> , <i>rpe</i> ,                                                                                                                                                              |                                 |          |

|      |                                   |         |                                   |                                                                                     |                                                                                                                                          |                                 |                                                                                                      |
|------|-----------------------------------|---------|-----------------------------------|-------------------------------------------------------------------------------------|------------------------------------------------------------------------------------------------------------------------------------------|---------------------------------|------------------------------------------------------------------------------------------------------|
|      |                                   |         |                                   |                                                                                     | <i>edd, eda</i>                                                                                                                          |                                 |                                                                                                      |
| 3    | The Tricarboxylic Acid Cycle      |         | 40                                | <i>sucAB, lpdA, sucCD, sdhABCD, frdABCD</i>                                         | <i>gltA, acnA, acnB, icdA, fumA, fumB, fumC, mdh</i>                                                                                     | <i>glpD, glpABC, glpK, glpF</i> | Contains also respiration and alternative carbon source <i>glp</i> genes.                            |
| 4    | Pyruvate metabolism               |         | 171                               | <i>pflAB, pflCD, focA</i>                                                           | <i>dld, ldhA, adhE, fdhF, hycBEFG, pta, ackA, purT, acs</i>                                                                              |                                 |                                                                                                      |
| 5    | Anapleurotic reactions            |         | No cluster                        |                                                                                     |                                                                                                                                          |                                 |                                                                                                      |
| 6    | Respiration                       |         | 21                                | <i>fdnGHI, fdolHG, fdhF, hyaABC, hybAC</i>                                          | <i>ndh, nuo, poxB, dld, glpD, glpABC, cyoABCD, cycBC, cydAB, cydABCD, appBC, cycBC, sdhABCD, trxB, pntAB, hycFGBE, atp, glpD, glpABC</i> |                                 | <i>glpD, glpABC</i> are in the TCA cluster                                                           |
| 7-27 | <b>Alternative carbon sources</b> |         |                                   |                                                                                     |                                                                                                                                          |                                 | Mainly small pathways, difficult resolution of orthology and specificity of enzymes and transporters |
| 8    | gslsetose                         | 9/9/10  | No cluster                        |                                                                                     |                                                                                                                                          |                                 |                                                                                                      |
| 17   | fucose                            | 13/11/9 | Two clusters                      | 5:<br><i>fucO, aldA, aldB, adhE, aldH</i><br>174:<br><i>fucI, fucK, fucA, fucP.</i> | <i>adhC, lldP</i>                                                                                                                        | 174: <i>rhaB, rhaD</i>          | <i>rha</i> are rhamnose catabolism genes                                                             |
| 19   | rhamnose                          | 4/4/4   | In cluster 174 (path. 17, fucose) |                                                                                     |                                                                                                                                          |                                 |                                                                                                      |
| 20   | arabinose                         | 6/5/6   | No cluster                        |                                                                                     |                                                                                                                                          |                                 |                                                                                                      |
| 21   | xylose                            | 4/5/4   | No cluster                        |                                                                                     |                                                                                                                                          |                                 |                                                                                                      |
| 25   | galacitol                         | 7/7/4   | No cluster                        |                                                                                     |                                                                                                                                          |                                 |                                                                                                      |
| 26   | glucerosol                        | 3/3/3   | In cluster 40 (path. 3, TCA)      |                                                                                     |                                                                                                                                          |                                 |                                                                                                      |

|              |                                              |          |            |                                                             |                                                                                                          |                                      |                                                                                                                                                                                                                                                                                                                                                                                                                                                                              |
|--------------|----------------------------------------------|----------|------------|-------------------------------------------------------------|----------------------------------------------------------------------------------------------------------|--------------------------------------|------------------------------------------------------------------------------------------------------------------------------------------------------------------------------------------------------------------------------------------------------------------------------------------------------------------------------------------------------------------------------------------------------------------------------------------------------------------------------|
| 27           | (deoxy)nucleosides                           | 3/3/3    | No cluster |                                                             |                                                                                                          |                                      |                                                                                                                                                                                                                                                                                                                                                                                                                                                                              |
| <b>28-36</b> | <b>Amino acid biosynthesis and transport</b> |          |            |                                                             |                                                                                                          |                                      |                                                                                                                                                                                                                                                                                                                                                                                                                                                                              |
| 28           | ASP and ASN                                  | 7/5/7    | No cluster |                                                             |                                                                                                          |                                      | No genomic links.                                                                                                                                                                                                                                                                                                                                                                                                                                                            |
| 29           | GLU and GLN                                  | 7/7/6    | No cluster |                                                             |                                                                                                          |                                      | Genomic links weak or absent.                                                                                                                                                                                                                                                                                                                                                                                                                                                |
| 30           | ALA                                          | 7/5/6    | No cluster |                                                             |                                                                                                          |                                      | Genomic links weak or absent.                                                                                                                                                                                                                                                                                                                                                                                                                                                |
| 31           | ARG, putrescine, spermidine                  | 30/25/26 | 41         | <i>argA, argB, argC, argD, argF, argI, argG, argH, yjGH</i> | <i>carAB</i> , all <i>spe</i> genes, all transporters                                                    | <i>gltBD</i>                         | 11th most tightly linked pathway; strong link to the histidine pathway. <i>carAB</i> is side input branch, in KEGG it is in the glutamate and pyrimidine pathways. Regulated by ArgR and other factors. All <i>spe</i> genes are lost: evidence against the arginine-polyamine superpathway. <i>gltBD</i> – glutamate synthase, the last reaction in the glutamate pathway; the first reaction in the arginine pathway ( <i>argA</i> ) uses glutamate as the main substrate. |
| 32           | PRO                                          | 6/8/6    | 181        | <i>proA, proB, proC</i>                                     | <i>argE</i> , transporters                                                                               |                                      | The pathway is recovered. <i>argE</i> also in the arginine pathway.                                                                                                                                                                                                                                                                                                                                                                                                          |
| 33a          | branched chain aa                            | 24/16/18 | 26         | <i>ilvBN, ilvIH, ilvC, ilvD, leuA, leuCD, leuB.</i>         | <i>ilvG(12)M, ilvA, tdcB, avtA, ilvE, tyrB,</i> transporters                                             |                                      | The VAL+ILE cluster. 3rd most tightly linked pathway; strong links to the histidine pathway.                                                                                                                                                                                                                                                                                                                                                                                 |
| 33b          | branched chain aa                            | 24/16/18 | 25         | <i>ilvA, tdcB, ilvBN, ilvIH, ilvC, ilvD</i>                 | <i>ilvG(12)M, avtA, ilvE, tyrB,</i> transporters                                                         |                                      | The LEU cluster. 3rd most tightly linked pathway; strong links to the histidine pathway.                                                                                                                                                                                                                                                                                                                                                                                     |
| 34           | aromatic aa (TRP, TYR, PHE)                  | 25/22/22 | 42         | <i>aroB, aroD, aroE, aroL, aroA, aroC, trpDE</i>            | <i>aroF, aroG, aroH, aroK, trpC, trpAB,</i> the TYR-PHE branch ( <i>pheA, tyrA, tyrB</i> ), transporters | <i>pabAB</i> from the folate pathway | The cluster covers the chorismate pathway and the tryptophan branch (upper part). All DAPH-synthases ( <i>aroF, aroG, aroH</i> ) are lost; they sometimes form parts of larger MC clusters including other <i>aro</i> genes. The <i>tyr</i> and <i>phe</i> genes are missing: evidence towards a specific subpatway? <i>pabAB</i> is homologous to <i>trpDE</i> , sometimes bifunctional, sometimes within aromatic aa operons [1].                                          |
| 35           | HIS                                          | 11/9/11  | 27         | <i>hisG, hisIE, hisA, hisFH, hisB, hisC, hisD,</i>          | <i>prsA, hisJMPQ</i>                                                                                     |                                      | 2nd most tightly linked pathway; strong links to the branched chain amino acid and arginine pathways. <i>prsA</i> in KEGG is in the pentose phosphate pathway. <i>hisJMPQ</i> is a transporter.                                                                                                                                                                                                                                                                              |
| 36           | SER and GLY                                  | 10/9/9   | No cluster |                                                             |                                                                                                          |                                      | Genomic links weak or absent.                                                                                                                                                                                                                                                                                                                                                                                                                                                |
| 37           | CYS                                          | 10/9/9   | 160        | <i>cysDN, cysC,</i>                                         | <i>cysE, cysM,</i>                                                                                       |                                      | The sulfate assimilation subpathway (exactly). The                                                                                                                                                                                                                                                                                                                                                                                                                           |

|              |                                                |          |                           |                                                                                         |                                                                 |                                                                                     |                                                                                                                                                                                                                                                                                                                                                                                                                                                               |
|--------------|------------------------------------------------|----------|---------------------------|-----------------------------------------------------------------------------------------|-----------------------------------------------------------------|-------------------------------------------------------------------------------------|---------------------------------------------------------------------------------------------------------------------------------------------------------------------------------------------------------------------------------------------------------------------------------------------------------------------------------------------------------------------------------------------------------------------------------------------------------------|
|              |                                                |          |                           | <i>cysH, cysIJ</i>                                                                      | <i>cysK</i> ,<br>transporters                                   |                                                                                     | H <sub>2</sub> S_CYS subpathway is in the methionine cluster.                                                                                                                                                                                                                                                                                                                                                                                                 |
| 37 / 39      | MET+CYS                                        | N/A      | 158                       | <i>metB, metC</i>                                                                       | <i>metA, metH, metE, metK, metD</i>                             | <i>cysE, cysM, cysK</i>                                                             | The core cysteine-methionine superpathway. <i>metB</i> and <i>metC</i> have weak links to <i>metA</i> and <i>metE</i> , no links to other <i>met</i> genes.                                                                                                                                                                                                                                                                                                   |
| 39           | MET                                            | 8/7/7    | 29                        | <i>metH, metE</i>                                                                       | <i>metA, metB, metC, metK, metD</i>                             | <i>metF</i>                                                                         | The downstream methionine subpathway. <i>metF</i> belongs to the one-carbon pathway, but has clear links with the methionine pathway (operons, co-regulation) [2].                                                                                                                                                                                                                                                                                            |
| 38           | THR and LYS                                    | 23/21/18 | 28                        | <i>thrA, metL, lysC, asd, thrA, metL, thrB, thrC, dapA, dapB</i>                        | <i>dapD, dapC, dapE, dapF, lysA, cadA, ldcC, 5 transporters</i> |                                                                                     | Few strong and medium links. <i>dapD</i> has only weak links, and <i>dapC</i> has no links, thus downstream <i>dap</i> and <i>lys</i> genes are lost. Co-regulation of <i>dap</i> and <i>lys</i> genes indeed is rather weak [3].                                                                                                                                                                                                                             |
| <b>40-50</b> | <b>Amino acid degradation</b>                  |          |                           |                                                                                         |                                                                 |                                                                                     |                                                                                                                                                                                                                                                                                                                                                                                                                                                               |
| 41           | ARG                                            | 9/9/7    | 176                       | <i>aldH, gabD, gabT, goaG,</i>                                                          | <i>pat, tynA, prr, sad, gabP</i>                                | <i>gadA, gadB</i>                                                                   | Isozymes <i>gadA</i> and <i>gadB</i> form the complete glutamate catabolism pathway.                                                                                                                                                                                                                                                                                                                                                                          |
| 48           | SER                                            | 5/5/3    | 32                        | <i>sdaA, sdaB</i>                                                                       | <i>tnaA, dsdA, cycA</i>                                         |                                                                                     | <i>sdaC</i> is serine transporter, should be in the pathway                                                                                                                                                                                                                                                                                                                                                                                                   |
| 49           | THR                                            | 5/5/3    | 33                        | <i>sdaA, sdaB, tdcC</i>                                                                 | <i>tdh, kbl, tdcB</i>                                           |                                                                                     | <i>tdcC</i> is threonine transporter, should be in the pathway                                                                                                                                                                                                                                                                                                                                                                                                |
| <b>51-52</b> | <b>Biosynthesis of purines and pyrimidines</b> |          |                           |                                                                                         |                                                                 |                                                                                     |                                                                                                                                                                                                                                                                                                                                                                                                                                                               |
| 51           | Purine biosynthesis                            | 17/15/17 | Upper: 43,<br>Middle: 16. | Upper: <i>purF, purD, purN, purL, purM, purH</i> .<br>Middle: <i>purK, purE, purC</i> . |                                                                 | <i>purT</i> .<br>Adenine: <i>purA, purB</i> .<br>Guanine: <i>guaA, guaB, guaC</i> . | Upper and parts of the common purine pathway. Cluster 52 (DUC-700) combines both parts. Almost complete pathway is recovered in many MC clusters. The adenine subpathway ( <i>purA, purB</i> ) has only weak links with the common subpathway (upper and middle part), although <i>purB</i> is also a step in the middle part. The guanine subpathway ( <i>guaA, guaB, guaC</i> ) has no links with other genes, nor between the <i>gua</i> genes themselves. |
| 52           | Pyrimidine biosynthesis                        | 6/6/6    | 178                       | <i>pyrD, pyre, pyrF</i>                                                                 | <i>pyrBI, pyrC, pyrG, (ntk)</i>                                 |                                                                                     | Middle (dihydroorotate_UDP) part of the pyrimidine biosynthesis pathway. Overall, 9th most tightly linked pathway. Missed: <i>carAB</i> (nitrogen metabolism_carbamoyl-L-aspartate, common step with the arginine pathway; in <i>E.coli</i> co-regulated with pyrimidine and arginine genes), <i>pyrBI</i> (strong and medium genomic links, no immediate metabolic links), <i>pyrC</i> (only one weak                                                        |

|         |                                                        |                                    |                                                |                                                                                                   |                                                                                                               |             |                                                                                                                                                                                                                                                                                                                                   |
|---------|--------------------------------------------------------|------------------------------------|------------------------------------------------|---------------------------------------------------------------------------------------------------|---------------------------------------------------------------------------------------------------------------|-------------|-----------------------------------------------------------------------------------------------------------------------------------------------------------------------------------------------------------------------------------------------------------------------------------------------------------------------------------|
|         |                                                        |                                    |                                                |                                                                                                   |                                                                                                               |             | link); <i>pyrG</i> and <i>ndk</i> (interconversion of pyrimidine di- and triphosphates).                                                                                                                                                                                                                                          |
| 54      | <b>One carbon metabolism</b>                           | 5/6/5                              | No cluster                                     |                                                                                                   |                                                                                                               |             |                                                                                                                                                                                                                                                                                                                                   |
| 55      | <b>Membrane lipid biosynthesis</b>                     | 11/6/11                            | Diverse MC clusters only                       |                                                                                                   |                                                                                                               |             |                                                                                                                                                                                                                                                                                                                                   |
| 56      | <b>Fatty acid metabolism</b>                           | 7/3/7                              | 20                                             | <i>atoB</i> ,<br><i>fadABDE</i>                                                                   | <i>fadL</i>                                                                                                   | <i>adhE</i> | <i>fadL</i> is a transporter. <i>adhE</i> is from the pyruvate metabolism                                                                                                                                                                                                                                                         |
| 57-72   | <b>Biosynthesis of cofactors and electron carriers</b> |                                    |                                                |                                                                                                   |                                                                                                               |             |                                                                                                                                                                                                                                                                                                                                   |
| 58      | Ubiquinone                                             | 9/9/9                              | No cluster                                     |                                                                                                   |                                                                                                               |             | Anonymous reaction in the middle, most links weak or absent.                                                                                                                                                                                                                                                                      |
| 59 / 60 | Menaquinone / Enterochelin                             | Menaq.: 8/7/8.<br>Enteroch.: 6/6/6 | 180                                            | Menaquinone: <i>menE</i> , <i>menF</i> , <i>menD</i> .<br>Enterochelin: <i>entC</i> , <i>entB</i> | <i>menE</i> , <i>menB</i> , <i>menA</i> , <i>menG</i> , <i>entA</i> , <i>entE</i> , <i>entF</i> , <i>entD</i> |             | Early reactions of the menaquinone and enterochelin biosynthesis. <i>menE</i> has only weak links and de-clusters highly linked <i>menB</i> . <i>entC</i> is an isoenzyme of <i>menF</i> from enterochelin pathway. Late reaction of the enterochelin pathway have almost no links. Menaquinone: 7th most tightly linked pathway. |
| 61      | Riboflavin                                             | 9/7/9                              | No cluster                                     |                                                                                                   |                                                                                                               |             | Several strong links (not necessarily linked metabolically) and no other links.                                                                                                                                                                                                                                                   |
| 62      | Folate                                                 | 11/10/11                           | See cluster 42 (aromatic AA)                   |                                                                                                   |                                                                                                               |             | 10th most tightly linked pathway.                                                                                                                                                                                                                                                                                                 |
| 63      | Coenzyme A                                             | 12/8/11                            | No cluster                                     |                                                                                                   |                                                                                                               |             | Many anonymous reactions (no genes).                                                                                                                                                                                                                                                                                              |
| 64      | NAD                                                    | 13/8/13                            | No cluster                                     |                                                                                                   |                                                                                                               |             |                                                                                                                                                                                                                                                                                                                                   |
| 67      | Tetrapyrrole                                           | 16/14/14                           | 44                                             | <i>hemA</i> , <i>hemL</i> , <i>hemB</i> , <i>hemC</i> , <i>hemD</i> , <i>hemX</i> , <i>cysG</i>   | <i>hemM</i> , <i>gltX</i> , <i>hemE</i> , <i>hemF</i> , <i>hemG</i> , <i>hemH</i> , <i>cyoE</i>               |             | Upper part of tetrapyrrole biosynthesis (thr glutamyl-tRNA_uroporphyrinogen-III subpathway). Overall, 12th most tightly linked pathway. <i>hemM</i> and <i>gltX</i> are glutamyl-tRNA synthetases. No heme subpathway ( <i>hemE</i> , <i>hemF</i> , <i>hemG</i> , <i>hemH</i> , <i>cyoE</i> ).                                    |
| 68      | Biotin                                                 | 4/4/4                              | 24                                             | <i>bioF</i> , <i>bioA</i> , <i>bioD</i> , <i>bioB</i>                                             |                                                                                                               |             | Biotin biosynthesis (exactly). 4th most tightly linked pathway.                                                                                                                                                                                                                                                                   |
| 70      | Thiamine                                               | 13/12/10                           | No standard cluster, only DUC-400-Neighborhood | <i>thiG</i> , <i>thiE</i> , <i>thiF</i> , <i>thiH</i> , <i>thiM</i>                               | <i>thiC</i> , <i>thin</i> , <i>thiD</i> , <i>thiB</i> , <i>thiK</i> , <i>thiL</i>                             |             | <i>thiG</i> , <i>thiE</i> , <i>thiF</i> , <i>thiH</i> catalyze the same reaction.                                                                                                                                                                                                                                                 |
| 71      | Pyridoxine                                             | 18/9/                              | 13                                             | <i>pdxH</i>                                                                                       | Rest of the pathway                                                                                           |             | Trivial cluster of four reactions catalyzed by <i>pdxH</i>                                                                                                                                                                                                                                                                        |
| 72-75   | <b>Cell membrane and cell wall</b>                     |                                    |                                                |                                                                                                   |                                                                                                               |             |                                                                                                                                                                                                                                                                                                                                   |
| 73      | Lipid A biosynthesis                                   | 9/8/9                              | 182                                            | <i>lpxA</i> , <i>lpxC</i> , <i>lpxD</i> , <i>lpxB</i>                                             | <i>ushA</i> , <i>kdtA</i> , <i>htrB</i> , <i>msbB</i>                                                         | <i>pyrH</i> | Upper part of the Lipid-A precursor biosynthesis pathway. <i>pyrH</i> is from the salvage pathways. <i>ushA</i>                                                                                                                                                                                                                   |

|    |                        |          |     |                                                              |                                     |                   |                                                                                                                                                                                                                                                                                                       |
|----|------------------------|----------|-----|--------------------------------------------------------------|-------------------------------------|-------------------|-------------------------------------------------------------------------------------------------------------------------------------------------------------------------------------------------------------------------------------------------------------------------------------------------------|
|    |                        |          |     |                                                              |                                     |                   | (3.6.1.45) has no genomic links because it may be known under a different name ( <i>lpxH</i> ). <i>kdtA</i> has strong genomic links, but is not clustered, because the intermediate step (2.7.1.130) has no name ( <i>lpxK</i> ). Pathway recovered in MC clusters. 5th most tightly linked pathway. |
| 74 | LPS sugar biosynthesis | 9/8/9    | 159 | <i>lpcA, rfaED, rfaLJIGFK</i>                                | <i>kdsA, kdsB, galU, galF, dgkA</i> | <i>htrB, msbB</i> | Small chimeric cluster of genes from the Lipid A and LPS sugar pathways. Many anonymous (no gene assigned) reactions in the LPS pathway. LPS and Lipid A form the 4th most highly cross-linked pathway pair.                                                                                          |
| 75 | Murein biosynthesis    | 10/10/10 | 45  | <i>murA, murB, murC, murD, murE, murF, ddlAB, mraY, murG</i> | <i>murI</i>                         |                   | Almost complete murein pathway. Most tightly linked pathway. <i>murI</i> : belongs to a side branch (glutamate racemase)                                                                                                                                                                              |

### References.

1. Panina, E.M., Vitreschak, A.G., Mironov, A.A., & Gelfand, M.S. (2003) *FEMS Microbiol. Lett.* **222**, 211-220.
2. Rodionov, D.A., Vitreschak, A.G., Mironov, A.A., & Gelfand, M.S. (2003) *Nucleic Acids Res.* **31**: 6748-6757.
3. Rodionov, D.A., Vitreschak, A.G., Mironov, A.A., & Gelfand, M.S. (2004) *Nucleic Acids Res.* **32**: 3340-3353.
